# Supplementary material
Source: PubMed Central journal article supplement (PMC2927989)
Supplement: NIHMS227070-supplement-protein_ID_table.pdf [file NIHMS227070-supplement-protein_ID_table.pdf]

# PROTEOMICS

## Supporting Information for Proteomics

**DOI 10.1002/pmic.200800495**

M. Reid Groseclose, Pierre P. Massion, Pierre Chaurand and Richard M. Caprioli

**High-throughput proteomic analysis of formalin-fixed paraffin-embedded  
tissue microarrays using MALDI imaging mass spectrometry**

# Table 1 Protein Identification

Search Parameters

Type of search : MS/MS Ion Search

Enzyme : Trypsin

Variable modifications : Acetyl (Protein N-term), Oxidation (M) (HW)

Mass values : Monoisotopic

Protein Mass : Unrestricted

Peptide Mass Tolerance : ± 200 ppm

Fragment Mass Tolerance: ± 0.4 Da

Max Missed Cleavages : 3

Instrument type : MALDI-TOF-TOF

Number of queries : 123

|                                                      | SwissProt | Decoy | False discovery rate |
|------------------------------------------------------|-----------|-------|----------------------|
| Peptide matches above identity threshold             | 94        | 0     | 0                    |
| Peptide matches above homology or identity threshold | 102       | 1     | 0.98                 |

| Keratin, type II cytoskeletal 6A | Macot Score (233) |           |        | ppm | Miss | Score   | Expect | Peptide                  |
|----------------------------------|-------------------|-----------|--------|-----|------|---------|--------|--------------------------|
| Observed                         | Mr(expt)          | Mr(calc)  |        |     |      |         |        |                          |
| 1016.5420                        | 1015.5347         | 1015.5298 | 4.83   | 0   | 41   | 0.0094  |        | R.QLDSIVGER.G            |
| 1165.5830                        | 1164.5757         | 1164.5775 | -1.51  | 0   | 62   | 5.7e-05 |        | K.YEELQVTAGR.H           |
| 1263.6915                        | 1262.6842         | 1262.687  | -2.22  | 0   | 81   | 9.2e-07 |        | K.LALDVEIATYR.K          |
| 1407.7100                        | 1406.7027         | 1406.7041 | -1.01  | 0   | 34   | 0.044   |        | K.ADTLTDEINFLR.A         |
| 1890.9550                        | 1889.9477         | 1889.9635 | -8.36  | 0   | 92   | 7.1e-08 |        | R.QNLEPLFEQYINLNR.R      |
| 2047.0294                        | 2046.0221         | 2046.0646 | -20.77 | 1   | 21   | 0.88    |        | R.QNLEPLFEQYINLNR.Q      |
| 2471.1831                        | 2470.1758         | 2470.1798 | -1.61  | 3   | 82   | 7.1e-07 |        | R.GMQDLVEDFKNKYEDEINKR.T |

| Keratin, type II cytoskeletal 5 | Macot Score (198) |           |        | ppm | Miss | Score   | Expect | Peptide               |
|---------------------------------|-------------------|-----------|--------|-----|------|---------|--------|-----------------------|
| Observed                        | Mr(expt)          | Mr(calc)  |        |     |      |         |        |                       |
| 1016.5420                       | 1015.5347         | 1015.5298 | 4.83   | 0   | 41   | 0.0094  |        | R.QLDSIVGER.G         |
| 1093.5220                       | 1092.5147         | 1092.5199 | -4.78  | 0   | 21   | 0.67    |        | K.AQYEEIANR.S         |
| 1263.6915                       | 1262.6842         | 1262.687  | -2.22  | 0   | 81   | 9.2e-07 |        | K.LALDVEIATYR.K       |
| 1410.7325                       | 1409.7252         | 1409.7151 | 7.21   | 0   | 44   | 0.0042  |        | R.SFSTASAITPSVSR.T    |
| 1439.7126                       | 1438.7053         | 1438.7053 | 0.04   | 0   | 66   | 2.6e-05 |        | R.GLVGVFGSGGGSSSSVK.F |
| 1890.9550                       | 1889.9477         | 1889.9635 | -8.36  | 0   | 92   | 7.1e-08 |        | R.QNLEPLFEQYINLNR.R   |
| 2047.0294                       | 2046.0221         | 2046.0646 | -20.77 | 1   | 21   | 0.88    |        | R.QNLEPLFEQYINLNR.Q   |

| Keratin, type II cytoskeletal 8 | Macot Score (144) |           |        | ppm | Miss | Score   | Expect | Peptide                             |
|---------------------------------|-------------------|-----------|--------|-----|------|---------|--------|-------------------------------------|
| Observed                        | Mr(expt)          | Mr(calc)  |        |     |      |         |        |                                     |
| 1129.6152                       | 1128.6079         | 1128.6138 | -5.25  | 0   | 48   | 0.0019  |        | K.LSELEAALQR.A                      |
| 1277.6904                       | 1276.6831         | 1276.7027 | -15.31 | 0   | 22   | 0.7     |        | K.LALDIEIATYR.K                     |
| 1419.7931                       | 1418.7858         | 1418.7405 | 31.9   | 0   | 64   | 4.7e-05 |        | R.LEGLTDEINFLR.Q                    |
| 1847.8475                       | 1846.8402         | 1846.7978 | 23.0   | 0   | 83   | 5.8e-07 |        | R.SNMDNMFESYINLNR.R                 |
| 1863.8770                       | 1862.8697         | 1862.7927 | 41.4   | 0   | (49) | 0.0013  |        | R.SNMDNMFESYINLNR.R + Oxidation (M) |

| Histone H2A | Macot Score (146) |           |        | ppm | Miss | Score   | Expect | Peptide                            |
|-------------|-------------------|-----------|--------|-----|------|---------|--------|------------------------------------|
| Observed    | Mr(expt)          | Mr(calc)  |        |     |      |         |        |                                    |
| 944.5400    | 943.5327          | 943.524   | 9.27   | 0   | 17   | 2.1     |        | R.AGLQFPVGR.V                      |
| 2915.5000   | 2914.4927         | 2914.5804 | -30.07 | 0   | 146  | 2.8e-13 |        | R.VGAGAPVYLAIVLEYLETAEILELAGNAAR.D |

| Alpha-enolase | Macot Score (122) |           |        | ppm | Miss | Score   | Expect | Peptide                             |
|---------------|-------------------|-----------|--------|-----|------|---------|--------|-------------------------------------|
| Observed      | Mr(expt)          | Mr(calc)  |        |     |      |         |        |                                     |
| 1129.6152     | 1128.6079         | 1128.6138 | -5.25  | 0   | 48   | 0.0019  |        | K.LSELEAALQR.A                      |
| 1277.6904     | 1276.6831         | 1276.7027 | -15.31 | 0   | 22   | 0.7     |        | K.LALDIEIATYR.K                     |
| 1419.7931     | 1418.7858         | 1418.7405 | 31.9   | 0   | 64   | 4.7e-05 |        | R.LEGLTDEINFLR.Q                    |
| 1847.8475     | 1846.8402         | 1846.7978 | 23.0   | 0   | 83   | 5.8e-07 |        | R.SNMDNMFESYINLNR.R                 |
| 1863.8770     | 1862.8697         | 1862.7927 | 41.4   | 0   | (49) | 0.0013  |        | R.SNMDNMFESYINLNR.R + Oxidation (M) |

| Keratin, type I cytoskeletal 19 | Macot Score (105) |           |        | ppm | Miss | Score   | Expect | Peptide                    |
|---------------------------------|-------------------|-----------|--------|-----|------|---------|--------|----------------------------|
| Observed                        | Mr(expt)          | Mr(calc)  |        |     |      |         |        |                            |
| 1082.5175                       | 1081.5102         | 1081.4829 | 25.3   | 0   | 27   | 0.16    |        | K.DAEAWFTSR.T              |
| 1122.5560                       | 1121.5487         | 1121.5717 | -20.45 | 0   | 40   | 0.01    |        | R.LEQEIATYR.S              |
| 1210.6031                       | 1209.5958         | 1209.5778 | 14.9   | 1   | 32   | 0.06    |        | R.KDAEAWFTSR.T             |
| 1222.6390                       | 1221.6317         | 1221.6353 | -2.95  | 1   | 55   | 0.00033 |        | R.TKPFETEQLR.M             |
| 1354.6100                       | 1353.6027         | 1353.5983 | 3.28   | 0   | 37   | 0.018   |        | R.SQYEVMAEQNR.K            |
| 1554.7480                       | 1553.7407         | 1553.7434 | -1.74  | 0   | 42   | 0.0065  |        | R.QSSATSSFGGLGGSVR.F       |
| 1674.8083                       | 1673.8010         | 1673.7685 | 19.4   | 0   | 50   | 0.001   |        | R.DYSHYTTIQDLR.D           |
| 2407.2258                       | 2406.2185         | 2406.3019 | -34.66 | 0   | 30   | 0.12    |        | R.FGAQLAHQALISGIEAQLGDVR.A |

| Tubulin beta-2C chain | Macot Score (118) |           |        | ppm | Miss | Score   | Expect | Peptide                      |
|-----------------------|-------------------|-----------|--------|-----|------|---------|--------|------------------------------|
| Observed              | Mr(expt)          | Mr(calc)  |        |     |      |         |        |                              |
| 1130.6021             | 1129.5948         | 1129.588  | 6.04   | 0   | 64   | 4.2e-05 |        | R.FPQQLNADLR.K               |
| 1143.6100             | 1142.6027         | 1142.627  | -21.27 | 0   | 29   | 0.15    |        | K.LAVNMVFPRL                 |
| 1601.8101             | 1600.8028         | 1600.8131 | -6.40  | 0   | 75   | 3.8e-06 |        | R.AVLVDLEPGTMDSVR.S          |
| 1620.8260             | 1619.8187         | 1619.8283 | -5.89  | 0   | 31   | 0.086   |        | R.LHFFMPGFAPLTSR.G           |
| 2798.4248             | 2797.4175         | 2797.3361 | 29.1   | 0   | 37   | 0.023   |        | R.SGPFQIFRPNFVFGQSGAGNNWAK.G |

| Serum albumin precursor | Macot Score (113) |           |        | ppm | Miss | Score   | Expect | Peptide                           |
|-------------------------|-------------------|-----------|--------|-----|------|---------|--------|-----------------------------------|
| Observed                | Mr(expt)          | Mr(calc)  |        |     |      |         |        |                                   |
| 927.4923                | 926.4850          | 926.4861  | -1.18  | 0   | 24   | 0.34    |        | K.YLYEIAR.R                       |
| 1467.8109               | 1466.8036         | 1466.8358 | -21.92 | 1   | 33   | 0.051   |        | R.RHPDYSVLLLR.L                   |
| 1511.7955               | 1510.7882         | 1510.8355 | -31.31 | 0   | 55   | 0.00038 |        | K.VPQVSTPTLVEVSR.N                |
| 1623.7710               | 1622.7637         | 1622.7803 | -10.21 | 0   | 59   | 0.00014 |        | K.DVFLGMFLYEYAR.R                 |
| 1639.7600               | 1638.7527         | 1638.7752 | -13.72 | 0   | (47) | 0.0021  |        | K.DVFLGMFLYEYAR.R + Oxidation (M) |
| 1898.9000               | 1897.8927         | 1897.9879 | -50.15 | 1   | 30   | 0.11    |        | R.RHPYFYAPPELLFFAKR               |

| Keratin, type II cytoskeletal 75 | Macot Score (110) |           |       | ppm | Miss | Score   | Expect | Peptide         |
|----------------------------------|-------------------|-----------|-------|-----|------|---------|--------|-----------------|
| Observed                         | Mr(expt)          | Mr(calc)  |       |     |      |         |        |                 |
| 1165.5830                        | 1164.5757         | 1164.5775 | -1.51 | 0   | 62   | 5.7e-05 |        | K.YEELQVTAGR.H  |
| 1263.6915                        | 1262.6842         | 1262.6870 | -2.22 | 0   | 81   | 9.2e-07 |        | K.LALDVEIATYR.K |

| Keratin, type II cytoskeletal 2 epidermal |           | Macot Score (103) |        |      |       |         |                      | Peptide |
|-------------------------------------------|-----------|-------------------|--------|------|-------|---------|----------------------|---------|
| Observed                                  | Mr(expt)  | Mr(calc)          | ppm    | Miss | Score | Expect  |                      |         |
| 1263.6915                                 | 1262.6842 | 1262.687          | -2.22  | 0    | 81    | 9.2e-07 | K.LALDVEIATYR.K      |         |
| 1320.6698                                 | 1319.6625 | 1319.5756         | 65.9   | 0    | 53    | 0.00057 | R.HGGGGGGFGGGGFGSR.S |         |
| 1475.7600                                 | 1474.7527 | 1474.778          | -17.13 | 0    | 21    | 0.83    | R.FLEQQNQLVLTQK.W    |         |

| Keratin, type I cytoskeletal 16 |           | Macot Score (94) |        |      |       |         |                         | Peptide |
|---------------------------------|-----------|------------------|--------|------|-------|---------|-------------------------|---------|
| Observed                        | Mr(expt)  | Mr(calc)         | ppm    | Miss | Score | Expect  |                         |         |
| 1036.5272                       | 1035.5199 | 1035.525         | -4.90  | 1    | 29    | 0.11    | K.IRDWYQR.Q             |         |
| 1122.5560                       | 1121.5487 | 1121.5717        | -20.45 | 0    | 40    | 0.01    | R.LEQEIATYR.R           |         |
| 1241.5970                       | 1240.5897 | 1240.587         | 2.22   | 0    | 35    | 0.031   | K.NHEEMLALR.G           |         |
| 1259.6740                       | 1258.6667 | 1258.6669        | -0.18  | 1    | 41    | 0.0082  | R.TKYEHELALR.Q          |         |
| 1757.8680                       | 1756.8607 | 1756.8784        | -10.06 | 1    | 34    | 0.045   | R.QRPSEIKDYSPTYFK.T     |         |
| 2064.1130                       | 2063.1057 | 2063.1375        | -15.38 | 0    | 67    | 2.4e-05 | K.IIAATIENAQPILQIDNAR.L |         |

| Vimentin  |           | Macot Score (88) |        |      |       |         |                            | Peptide |
|-----------|-----------|------------------|--------|------|-------|---------|----------------------------|---------|
| Observed  | Mr(expt)  | Mr(calc)         | ppm    | Miss | Score | Expect  |                            |         |
| 1428.7123 | 1427.7050 | 1427.7045        | 0.38   | 0    | 77    | 2.4e-06 | R.SLYASSPGGVYATR.S         |         |
| 2497.2173 | 2496.2100 | 2496.2496        | -15.86 | 1    | 41    | 0.0089  | R.LLQDSVDFSLADAINTEFKNTR.T |         |

| Keratin, type I cytoskeletal 15 |           | Macot Score (108) |        |      |       |         |                                                              | Peptide |
|---------------------------------|-----------|-------------------|--------|------|-------|---------|--------------------------------------------------------------|---------|
| Observed                        | Mr(expt)  | Mr(calc)          | ppm    | Miss | Score | Expect  |                                                              |         |
| 1122.5560                       | 1121.5487 | 1121.5717         | -20.45 | 0    | 40    | 0.01    | R.LEQEIATYR.S                                                |         |
| 1248.6610                       | 1247.6537 | 1247.6873         | -26.94 | 1    | 45    | 0.0037  | R.LKYENALR.Q                                                 |         |
| 1821.8787                       | 1820.8714 | 1820.8766         | -2.84  | 0    | 77    | 2.4e-06 | R.GGSLLAGGGGFGGSLSGGGSR.S                                    |         |
| 1877.8959                       | 1876.8886 | 1876.8803         | 4.42   | 0    | 41    | 0.0079  | M <sub>1</sub> TTTFLQTSSTFGGGSTR.G + Acetyl (Protein N-term) |         |

| Ferritin light chain |           | Macot Score (101) |        |      |       |         |                     | Peptide |
|----------------------|-----------|-------------------|--------|------|-------|---------|---------------------|---------|
| Observed             | Mr(expt)  | Mr(calc)          | ppm    | Miss | Score | Expect  |                     |         |
| 1607.7820            | 1606.7747 | 1606.7991         | -15.17 | 0    | 84    | 4.5e-07 | R.LGGPEAGLGEYLFER.L |         |
| 1719.9220            | 1718.9147 | 1718.9791         | -37.46 | 1    | 49    | 0.0014  | K.KLNQALDLHALGSAR.T |         |

| Protein S100-A9 |           | Macot Score (72) |        |      |       |         |                    | Peptide |
|-----------------|-----------|------------------|--------|------|-------|---------|--------------------|---------|
| Observed        | Mr(expt)  | Mr(calc)         | ppm    | Miss | Score | Expect  |                    |         |
| 1455.7142       | 1454.7069 | 1454.7154        | -5.82  | 0    | 18    | 1.6     | K.LGHPTDLNQGFEK.E  |         |
| 1614.7900       | 1613.7827 | 1613.7945        | -7.32  | 0    | 53    | 0.00062 | K.QLSFEEFIMLMAR.L  |         |
| 1806.9113       | 1805.9040 | 1805.9312        | -15.04 | 0    | 51    | 0.00087 | R.NIETINTFHQYSVK.L |         |

| Keratin, type I cytoskeletal 13 |           | Macot Score (71) |        |      |       |         |                    | Peptide |
|---------------------------------|-----------|------------------|--------|------|-------|---------|--------------------|---------|
| Observed                        | Mr(expt)  | Mr(calc)         | ppm    | Miss | Score | Expect  |                    |         |
| 1122.5560                       | 1121.5487 | 1121.5717        | -20.45 | 0    | 40    | 0.01    | R.LEQEIATYR.S      |         |
| 1248.6610                       | 1247.6537 | 1247.6873        | -26.94 | 1    | 45    | 0.0037  | R.LKYENALR.Q       |         |
| 1392.6880                       | 1391.6807 | 1391.6867        | -4.32  | 0    | 51    | 0.00082 | K.MIGFPSSAGSVSPR.S |         |

| 78 kDa glucose-regulated protein precursor |           | Macot Score (78) |       |      |       |         |                       | Peptide |
|--------------------------------------------|-----------|------------------|-------|------|-------|---------|-----------------------|---------|
| Observed                                   | Mr(expt)  | Mr(calc)         | ppm   | Miss | Score | Expect  |                       |         |
| 1566.7791                                  | 1565.7718 | 1565.7726        | -0.48 | 0    | 51    | 0.00078 | R.ITPSYVAFTPEGER.L    |         |
| 1999.0770                                  | 1998.0697 | 1998.0786        | -4.44 | 0    | 58    | 0.0002  | R.GVPQIEVTFEIVDNGILR. |         |

| Keratin, type I cytoskeletal 17 |           | Macot Score (62) |        |      |       |         |                         | Peptide |
|---------------------------------|-----------|------------------|--------|------|-------|---------|-------------------------|---------|
| Observed                        | Mr(expt)  | Mr(calc)         | ppm    | Miss | Score | Expect  |                         |         |
| 1036.5272                       | 1035.5199 | 1035.5250        | -4.90  | 1    | 29    | 0.11    | K.IRDWYQR.Q             |         |
| 1122.5560                       | 1121.5487 | 1121.5717        | -20.45 | 0    | 40    | 0.01    | R.LEQEIATYR.R           |         |
| 1222.6390                       | 1221.6317 | 1221.6353        | -2.95  | 1    | 55    | 0.00033 | R.TKFETEQALR.L          |         |
| 2114.0249                       | 2113.0176 | 2113.011         | 3.14   | 0    | 26    | 0.32    | R.GQVGGIEVEMDAAPGVDLR.I |         |

| Pulmonary surfactant-associated protein A1 precursor |           | Macot Score (103) |        |      |       |         |                                            | Peptide |
|------------------------------------------------------|-----------|-------------------|--------|------|-------|---------|--------------------------------------------|---------|
| Observed                                             | Mr(expt)  | Mr(calc)          | ppm    | Miss | Score | Expect  |                                            |         |
| 1447.7350                                            | 1446.7277 | 1446.699          | 19.8   | 0    | 52    | 0.00069 | R.NPEENEAIASFVK.K                          |         |
| 1506.8000                                            | 1505.7927 | 1505.7759         | 11.1   | 0    | 23    | 0.51    | R.GALSLQGSIMTVGEK.V + Oxidation (M)        |         |
| 1984.0176                                            | 1983.0103 | 1983.0425         | -16.22 | 1    | 37    | 0.023   | R.IAVPRNPEENEAIASFVK.K                     |         |
| 2106.9856                                            | 2105.9783 | 2105.9694         | 4.22   | 0    | 48    | 0.002   | K.YNTYAYVGLTEGSPGDFR.Y                     |         |
| 2329.1340                                            | 2328.1267 | 2328.1499         | -9.94  | 0    | 61    | 8.4e-05 | R.GPPGLPAHLDEELQATLHDFR.H + Oxidation (HW) |         |

| Tubulin beta-2A chain |           | Macot Score (74) |        |      |       |         |                                | Peptide |
|-----------------------|-----------|------------------|--------|------|-------|---------|--------------------------------|---------|
| Observed              | Mr(expt)  | Mr(calc)         | ppm    | Miss | Score | Expect  |                                |         |
| 1130.6021             | 1129.5948 | 1129.588         | 6.04   | 0    | 64    | 4.2e-05 | R.FPQQLNADLR.K                 |         |
| 1143.6100             | 1142.6027 | 1142.627         | -21.27 | 0    | 29    | 0.15    | K.LAVNMVFPFR.L                 |         |
| 1615.8186             | 1614.8113 | 1614.8287        | -10.76 | 0    | 20    | 1.1     | R.AILVDLEPGTMDSVR.S            |         |
| 1620.8260             | 1619.8187 | 1619.8283        | -5.89  | 0    | 31    | 0.086   | R.LHFFMPGFAPLTSR.G             |         |
| 2798.4248             | 2797.4175 | 2797.3361        | 29.1   | 0    | 37    | 0.023   | R.SGPFQGFIRPDNFVGGSGAGNWNWAK.G |         |

| Histone H4 |           | Macot Score (57) |        |      |       |         |                  | Peptide |
|------------|-----------|------------------|--------|------|-------|---------|------------------|---------|
| Observed   | Mr(expt)  | Mr(calc)         | ppm    | Miss | Score | Expect  |                  |         |
| 989.5700   | 988.5627  | 988.5706         | -7.91  | 0    | 36    | 0.025   | K.VFLENVIR.D     |         |
| 1325.7233  | 1324.7160 | 1324.7463        | -22.84 | 0    | 54    | 0.00044 | R.DNIQGITKPAIR.R |         |

| Keratin, type I cytoskeletal 18 |           | Macot Score (82) |        |      |       |        |                                     | Peptide |
|---------------------------------|-----------|------------------|--------|------|-------|--------|-------------------------------------|---------|
| Observed                        | Mr(expt)  | Mr(calc)         | ppm    | Miss | Score | Expect |                                     |         |
| 965.4800                        | 964.4727  | 964.4614         | 11.7   | 0    | 36    | 0.024  | R.AQYDELAR.K                        |         |
| 975.4492                        | 974.4419  | 974.4458         | -3.91  | 0    | 31    | 0.085  | R.STFSTNYR.S                        |         |
| 2670.3108                       | 2669.3035 | 2669.3846        | -30.38 | 0    | 48    | 0.0018 | R.YALQMEQLNGILLHESELAQTR.A          |         |
| 2854.3882                       | 2853.3809 | 2853.4005        | -6.88  | 0    | 50    | 0.0012 | R.SLGSVQAPSYGARPVSSAASVYAGAGGSGSR.I |         |

| Actin, cytoplasmic |           | Macot Score (90) |        |      |       |         |                           | Peptide |
|--------------------|-----------|------------------|--------|------|-------|---------|---------------------------|---------|
| Observed           | Mr(expt)  | Mr(calc)         | ppm    | Miss | Score | Expect  |                           |         |
| 976.4540           | 975.4467  | 975.441          | 5.84   | 0    | 30    | 0.1     | K.AGFAGDDAPR.A            |         |
| 1515.6600          | 1514.6527 | 1514.7419        | -58.85 | 0    | 59    | 0.00014 | K.IWHHTFYNELR.V           |         |
| 1790.8907          | 1789.8834 | 1789.8846        | -0.67  | 0    | 61    | 8.9e-05 | K.SYELPDGQVITIGNER.F      |         |
| 2215.0000          | 2213.9927 | 2214.0627        | -31.60 | 0    | 28    | 0.19    | K.DLYANTVLSGGTMMYPGIADR.M |         |

**Proteins Identified with De Novo Sequencing**

| Vitronectin precursor |           | Macot Score (56) |      |      |       |         |                      | Peptide |  |
|-----------------------|-----------|------------------|------|------|-------|---------|----------------------|---------|--|
| Observed              | Mr(expt)  | Mr(calc)         | ppm  | Miss | Score | Expect  |                      |         |  |
| 1314.6980             | 1313.6907 | 1313.6728        | 13.6 | 1    | 29    | 0.14    | R.RVDTVDPPYPR.S      |         |  |
| 1646.8475             | 1645.8402 | 1645.81          | 18.3 | 0    | 54    | 0.00042 | R.DVWGIEGPIAFAFR.I   |         |  |
| 1666.7800             | 1665.7727 | 1665.7682        | 2.72 | 0    | 30    | 0.11    | R.DWHGVPGQVDAAMAGR.I |         |  |

  

| Glutathione S-transferase P |           | Macot Score (46) |        |      |       |        |                    | Peptide |  |
|-----------------------------|-----------|------------------|--------|------|-------|--------|--------------------|---------|--|
| Observed                    | Mr(expt)  | Mr(calc)         | ppm    | Miss | Score | Expect |                    |         |  |
| 1337.7000                   | 1336.6927 | 1336.718         | -18.89 | 0    | 29    | 0.13   | M.PPYTVVYFPVR.G    |         |  |
| 1883.9390                   | 1882.9317 | 1882.9425        | -5.72  | 0    | 46    | 0.0031 | K.FQDGLTLYQSNILR.H |         |  |

  

| Keratin, type II cytoskeletal 7 |           | Macot Score (61) |        |      |       |         |                                                         | Peptide |  |
|---------------------------------|-----------|------------------|--------|------|-------|---------|---------------------------------------------------------|---------|--|
| Observed                        | Mr(expt)  | Mr(calc)         | ppm    | Miss | Score | Expect  |                                                         |         |  |
| 1277.6904                       | 1276.6831 | 1276.7027        | -15.31 | 0    | 22    | 0.7     | K.LALDIEIATYR.K                                         |         |  |
| 1406.7100                       | 1405.7027 | 1405.699         | 2.63   | 0    | 61    | 7.9e-05 | M <sub>2</sub> SIHFSSPVFTSR.S + Acetyl (Protein N-term) |         |  |
| 1442.7550                       | 1441.7477 | 1441.7929        | -31.33 | 0    | 21    | 0.89    | R.LPDIFEAQIAGLR.G                                       |         |  |
| 1453.8199                       | 1452.8126 | 1452.83          | -11.96 | 0    | 28    | 0.16    | R.EVTINQSLAPLR.L                                        |         |  |

  

| Ig alpha chain C region |           | Macot Score (63) |        |      |       |         |                       | Peptide |  |
|-------------------------|-----------|------------------|--------|------|-------|---------|-----------------------|---------|--|
| Observed                | Mr(expt)  | Mr(calc)         | ppm    | Miss | Score | Expect  |                       |         |  |
| 1213.6259               | 1212.6186 | 1212.6251        | -5.35  | 0    | 32    | 0.064   | R.WLQGSQELPR.E        |         |  |
| 1835.9080               | 1834.9007 | 1834.9425        | -22.77 | 0    | 63    | 5.4e-05 | R.QEPSQGTTFVAVTSILR.V |         |  |

  

| Pyruvate kinase isozymes M1/M2 |           | Macot Score (68) |        |      |       |         |                            | Peptide |  |
|--------------------------------|-----------|------------------|--------|------|-------|---------|----------------------------|---------|--|
| Observed                       | Mr(expt)  | Mr(calc)         | ppm    | Miss | Score | Expect  |                            |         |  |
| 1859.8700                      | 1858.8627 | 1858.8924        | -15.96 | 0    | 46    | 0.0026  | K.FGVEQDQDMVFASFIR.K       |         |  |
| 2465.2520                      | 2464.2447 | 2464.2849        | -16.32 | 0    | 55    | 0.00036 | R.TATESFASDPILYRPAVALDTK.G |         |  |

  

| Fibrinogen beta chain precursor |           | Macot Score (50) |        |      |       |        |                        | Peptide |  |
|---------------------------------|-----------|------------------|--------|------|-------|--------|------------------------|---------|--|
| Observed                        | Mr(expt)  | Mr(calc)         | ppm    | Miss | Score | Expect |                        |         |  |
| 980.4486                        | 979.4413  | 979.4359         | 5.50   | 0    | 39    | 0.011  | R.QDGSVDFGR.K          |         |  |
| 1239.5300                       | 1238.5227 | 1238.5105        | 9.88   | 0    | 25    | 0.26   | K.EDGGGWYNR.C          |         |  |
| 1950.9750                       | 1949.9677 | 1949.9959        | -14.45 | 0    | 39    | 0.015  | R.EEAPSLRPAPPISGGGYR.A |         |  |

  

| Fibrinogen gamma chain precursor |           | Macot Score (47) |        |      |       |        |                     | Peptide |  |
|----------------------------------|-----------|------------------|--------|------|-------|--------|---------------------|---------|--|
| Observed                         | Mr(expt)  | Mr(calc)         | ppm    | Miss | Score | Expect |                     |         |  |
| 1117.5070                        | 1116.4997 | 1116.52          | -18.14 | 0    | 38    | 0.019  | R.VELEDWNGR.T       |         |  |
| 1682.9268                        | 1681.9195 | 1681.9515        | -19.02 | 0    | 40    | 0.0099 | K.IHLISTQSAIPYALR.V |         |  |

  

| Heat shock protein beta-1 |           | Mascot Score (50) |        |      |       |        |                       | Peptide |  |
|---------------------------|-----------|-------------------|--------|------|-------|--------|-----------------------|---------|--|
| Observed                  | Mr(expt)  | Mr(calc)          | ppm    | Miss | Score | Expect |                       |         |  |
| 987.5430                  | 986.5358  | 986.6025          | -67.68 | 1    | 42    | 0.0069 | R.RVPFSLLR.G          |         |  |
| 1163.6035                 | 1162.5962 | 1162.6135         | -14.86 | 0    | 20    | 0.94   | R.LFDQAFGLPR.L        |         |  |
| 1905.9900                 | 1904.9827 | 1904.9843         | -0.85  | 0    | 41    | 0.0095 | K.LATQSNEITIPVTFESR.A |         |  |

| Collagen alpha-1(I) chain precursor |          |          |      |      |       |        | Peptide                                        |
|-------------------------------------|----------|----------|------|------|-------|--------|------------------------------------------------|
| Observed                            | Mr(expt) | Mr(calc) | ppm  | Miss | Score | Expect |                                                |
| 1105.578                            | 1104.570 | 1104.567 | 2.8  | 0    |       |        | GVQGGPPGAGPR (Hydroxylated)                    |
| 1459.711                            | 1458.703 | 1458.759 | 38.4 | 0    |       |        | GSAGPPGATGFPGAAGR (Hydroxylated)               |
| 898.484                             | 897.476  | 897.502  | 29.5 | 0    |       |        | GVVGLPGQR (Hydroxylated)                       |
| 2705.260                            | 2704.252 | 2704.247 | 1.9  | 0    |       |        | GFSGLQGGPPGPGSGEQGSPGASGPAGPR (Hydroxylated)   |
| 2869.418                            | 2868.410 | 2868.399 | 3.7  | 1    |       |        | GLTGPIGPPGAGAGGDKGESGSPGAPGTGAR (Hydroxylated) |

| Collagen alpha-2(I) chain precursor |          |          |      |      |       |        | Peptide                                           |
|-------------------------------------|----------|----------|------|------|-------|--------|---------------------------------------------------|
| Observed                            | Mr(expt) | Mr(calc) | ppm  | Miss | Score | Expect |                                                   |
| 1477.760                            | 1476.752 | 1476.747 | 3.7  | 0    |       |        | GLHGEFGLPGPAGPR (Hydroxylated)                    |
| 1562.804                            | 1561.796 | 1561.781 | 9.9  | 0    |       |        | GETGSPGVPAGAVGPR                                  |
| 1493.771                            | 1492.763 | 1492.742 | 14.4 | 0    |       |        | GLHGEFGLPGPAGPR (Hydroxylated)                    |
| 1533.719                            | 1532.711 | 1532.667 | 28.7 | 0    |       |        | GDGGPPGMTGFPGAAGR (Hydroxylated)                  |
| 1655.823                            | 1654.815 | 1654.806 | 5.7  | 1    |       |        | GFPGADGVAGPKGPAGER (Hydroxylated)                 |
| 2959.415                            | 2958.407 | 2958.348 | 19.8 | 0    |       |        | GPPGAAGAGPQQGFQGPAGEPGEPPQGTGPAGAR (Hydroxylated) |

# Tentative Protein Identifications

|                                                           |                   |           |        |      |       |         |                                     |  |
|-----------------------------------------------------------|-------------------|-----------|--------|------|-------|---------|-------------------------------------|--|
| Protein disulfide-isomerase precursor                     | Mascot Score (50) |           |        |      |       |         |                                     |  |
| Observed                                                  | Mr(expt)          | Mr(calc)  | ppm    | Miss | Score | Expect  | Peptide                             |  |
| 1780.8400                                                 | 1779.8327         | 1779.8275 | 2.93   | 0    | 50    | 0.001   | K.VDATEESDLAQYGVR.G                 |  |
| Fibrinogen alpha chain precursor                          | Mascot Score (78) |           |        |      |       |         |                                     |  |
| Observed                                                  | Mr(expt)          | Mr(calc)  | ppm    | Miss | Score | Expect  | Peptide                             |  |
| 1520.7173                                                 | 1519.7100         | 1519.7267 | -10.96 | 0    | 78    | 1.7e-06 | K.GLIDEVNDQFTNR.I                   |  |
| Aldo-keto reductase family 1 member C1                    | Mascot Score (85) |           |        |      |       |         |                                     |  |
| Observed                                                  | Mr(expt)          | Mr(calc)  | ppm    | Miss | Score | Expect  | Peptide                             |  |
| 2179.0750                                                 | 2178.0677         | 2178.0817 | -6.44  | 0    | 85    | 3.8e-07 | R.HIDSAHLYNNEEQVGLAIR.S             |  |
| Glyceraldehyde-3-phosphate dehydrogenase                  | Mascot Score (79) |           |        |      |       |         |                                     |  |
| Observed                                                  | Mr(expt)          | Mr(calc)  | ppm    | Miss | Score | Expect  | Peptide                             |  |
| 1763.8364                                                 | 1762.8291         | 1762.7951 | 19.3   | 0    | 79    | 1.5e-06 | K.LISWYDNEFGYSNR.V                  |  |
| Carbonyl reductase [NADPH] 1                              | Mascot Score (72) |           |        |      |       |         |                                     |  |
| Observed                                                  | Mr(expt)          | Mr(calc)  | ppm    | Miss | Score | Expect  | Peptide                             |  |
| 1652.8300                                                 | 1651.8227         | 1651.8642 | -25.09 | 0    | 72    | 8e-06   | R.GQAAVQQLQAEGLSPR.F                |  |
| Hemoglobin subunit alpha                                  | Mascot Score (69) |           |        |      |       |         |                                     |  |
| Observed                                                  | Mr(expt)          | Mr(calc)  | ppm    | Miss | Score | Expect  | Peptide                             |  |
| 1833.9000                                                 | 1832.8927         | 1832.8846 | 4.43   | 0    | 69    | 1.6e-05 | K.TYFPHFDLSHGSAQVK.G                |  |
| Annexin A1                                                | Mascot Score (63) |           |        |      |       |         |                                     |  |
| Observed                                                  | Mr(expt)          | Mr(calc)  | ppm    | Miss | Score | Expect  | Peptide                             |  |
| 1702.8875                                                 | 1701.8802         | 1701.8785 | 1.03   | 0    | 63    | 6e-05   | K.GLGTDEDTLIEILASR.T                |  |
| Carcinoembryonic antigen-related cell adhesion molecule 5 | Mascot Score (69) |           |        |      |       |         |                                     |  |
| Observed                                                  | Mr(expt)          | Mr(calc)  | ppm    | Miss | Score | Expect  | Peptide                             |  |
| 2177.0930                                                 | 2176.0857         | 2176.1277 | -19.28 | 0    | 69    | 1.4e-05 | R.QIIQYVIGTQQATPGPAYSGR.E           |  |
| Apolipoprotein A-I precursor                              | Mascot Score (53) |           |        |      |       |         |                                     |  |
| Observed                                                  | Mr(expt)          | Mr(calc)  | ppm    | Miss | Score | Expect  | Peptide                             |  |
| 1301.6510                                                 | 1300.6437         | 1300.6411 | 1.98   | 0    | 53    | 0.00059 | R.THLAPYSDELRL.Q                    |  |
| Histone H2B                                               | Mascot Score (47) |           |        |      |       |         |                                     |  |
| Observed                                                  | Mr(expt)          | Mr(calc)  | ppm    | Miss | Score | Expect  | Peptide                             |  |
| 1759.8075                                                 | 1758.8002         | 1758.8069 | -3.80  | 0    | 47    | 0.0015  | K.AMGIMNSFVNDIFER.I + Oxidation (M) |  |
| Annexin A2                                                | Mascot Score (47) |           |        |      |       |         |                                     |  |
| Observed                                                  | Mr(expt)          | Mr(calc)  | ppm    | Miss | Score | Expect  | Peptide                             |  |
| 1111.5660                                                 | 1110.5587         | 1110.5458 | 11.6   | 0    | 47    | 0.0019  | R.QDIAFYQRR.R                       |  |
| Macrophage migration inhibitory factor                    | Mascot Score (50) |           |        |      |       |         |                                     |  |
| Observed                                                  | Mr(expt)          | Mr(calc)  | ppm    | Miss | Score | Expect  | Peptide                             |  |
| 1287.6816                                                 | 1286.6743         | 1286.6805 | -4.82  | 0    | 50    | 0.001   | M.PMFIVNTNVPRL.A                    |  |
| Serum amyloid P-component precursor                       | Mascot Score (45) |           |        |      |       |         |                                     |  |
| Observed                                                  | Mr(expt)          | Mr(calc)  | ppm    | Miss | Score | Expect  | Peptide                             |  |
| 1156.5970                                                 | 1155.5897         | 1155.5924 | -2.32  | 0    | 45    | 0.0034  | R.VGEYSLYIGR.H                      |  |
| Tubulin alpha-1A chain                                    | Mascot Score (45) |           |        |      |       |         |                                     |  |
| Observed                                                  | Mr(expt)          | Mr(calc)  | ppm    | Miss | Score | Expect  | Peptide                             |  |
| 1701.8616                                                 | 1700.8543         | 1700.8985 | -25.98 | 0    | 45    | 0.0037  | R.AVFVDLEPTVIDEVR.T                 |  |

|                                                |                   |           |        |      |       |         |  |                                                  |
|------------------------------------------------|-------------------|-----------|--------|------|-------|---------|--|--------------------------------------------------|
| Stathmin                                       | Mascot Score (49) |           |        |      |       |         |  | Peptide                                          |
| Observed                                       | Mr(expt)          | Mr(calc)  | ppm    | Miss | Score | Expect  |  | R.ASGQAFELISPR.S                                 |
| 1388.7150                                      | 1387.7077         | 1387.7459 | -27.54 | 0    | 49    | 0.0012  |  |                                                  |
| Peptidyl-prolyl cis-trans isomerase A          | Mascot Score (46) |           |        |      |       |         |  | Peptide                                          |
| Observed                                       | Mr(expt)          | Mr(calc)  | ppm    | Miss | Score | Expect  |  | M_VNPTVFFDIAVDGEPLGR.V + Acetyl (Protein N-term) |
| 1987.9899                                      | 1986.9826         | 1987.0051 | -11.32 | 0    | 46    | 0.0029  |  |                                                  |
| Protein disulfide-isomerase A3 precursor       | Mascot Score (46) |           |        |      |       |         |  | Peptide                                          |
| Observed                                       | Mr(expt)          | Mr(calc)  | ppm    | Miss | Score | Expect  |  | R.ELSDFISYLQR.E                                  |
| 1370.7358                                      | 1369.7285         | 1369.6878 | 29.8   | 0    | 46    | 0.0024  |  |                                                  |
| Histone H3-like                                | Mascot Score (45) |           |        |      |       |         |  | Peptide                                          |
| Observed                                       | Mr(expt)          | Mr(calc)  | ppm    | Miss | Score | Expect  |  | R.KLPFQR.L                                       |
| 788.4709                                       | 787.4636          | 787.4704  | -8.67  | 1    | 45    | 0.0035  |  |                                                  |
| Polymeric immunoglobulin receptor precursor    | Mascot Score (48) |           |        |      |       |         |  | Peptide                                          |
| Observed                                       | Mr(expt)          | Mr(calc)  | ppm    | Miss | Score | Expect  |  | R.LVSLTLNLVTR.A                                  |
| 1228.7552                                      | 1227.7479         | 1227.7551 | -5.82  | 0    | 48    | 0.0019  |  |                                                  |
| Heterogeneous nuclear ribonucleoproteins A2/B1 | Mascot Score (46) |           |        |      |       |         |  | Peptide                                          |
| Observed                                       | Mr(expt)          | Mr(calc)  | ppm    | Miss | Score | Expect  |  | R.GGGGNFGPGGSNFR.G                               |
| 1377.6200                                      | 1376.6127         | 1376.6222 | -6.88  | 0    | 46    | 0.0024  |  |                                                  |
| Protein S100-P                                 | Mascot Score (47) |           |        |      |       |         |  | Peptide                                          |
| Observed                                       | Mr(expt)          | Mr(calc)  | ppm    | Miss | Score | Expect  |  | M_TELETAMGMIIDVFSR.Y + Acetyl (Protein N-term)   |
| 1854.8900                                      | 1853.8827         | 1853.8903 | -4.09  | 0    | 47    | 0.0023  |  |                                                  |
| Myosin-9 - Homo sapiens (Human)                | Mascot Score (43) |           |        |      |       |         |  | Peptide                                          |
| Observed                                       | Mr(expt)          | Mr(calc)  | ppm    | Miss | Score | Expect  |  | K.ANLQIDQINTDLNLR.S                              |
| 1869.9500                                      | 1868.9427         | 1868.9592 | -8.80  | 0    | 43    | 0.005   |  |                                                  |
| Keratin, type II cytoskeletal 3                | Mascot Score (81) |           |        |      |       |         |  | Peptide                                          |
| Observed                                       | Mr(expt)          | Mr(calc)  | ppm    | Miss | Score | Expect  |  | K.LALDVEIATYR.K                                  |
| 1263.6915                                      | 1262.6842         | 1262.6870 | -2.22  | 0    | 81    | 9.2e-07 |  |                                                  |
| Hemoglobin subunit beta                        | Mascot Score (66) |           |        |      |       |         |  | Peptide                                          |
| Observed                                       | Mr(expt)          | Mr(calc)  | ppm    | Miss | Score | Expect  |  | R.LLVVYPWTQR.F                                   |
| 1274.7000                                      | 1273.6927         | 1273.7183 | -20.07 | 0    | 66    | 2.9e-05 |  |                                                  |

|                                  |                   |           |           |        |      |       |         |                  |
|----------------------------------|-------------------|-----------|-----------|--------|------|-------|---------|------------------|
| Fibrinogen alpha chain precursor | Mascot Score (61) | Mr(expt)  | Mr(calc)  | ppm    | Miss | Score | Expect  | Peptide          |
| Observed                         |                   | 1519.7100 | 1519.7267 | -10.96 | 0    | 61    | 5.4e-05 | K.GLIDEVNDFTNR.I |
| 1520.7173                        |                   |           |           |        |      |       |         |                  |

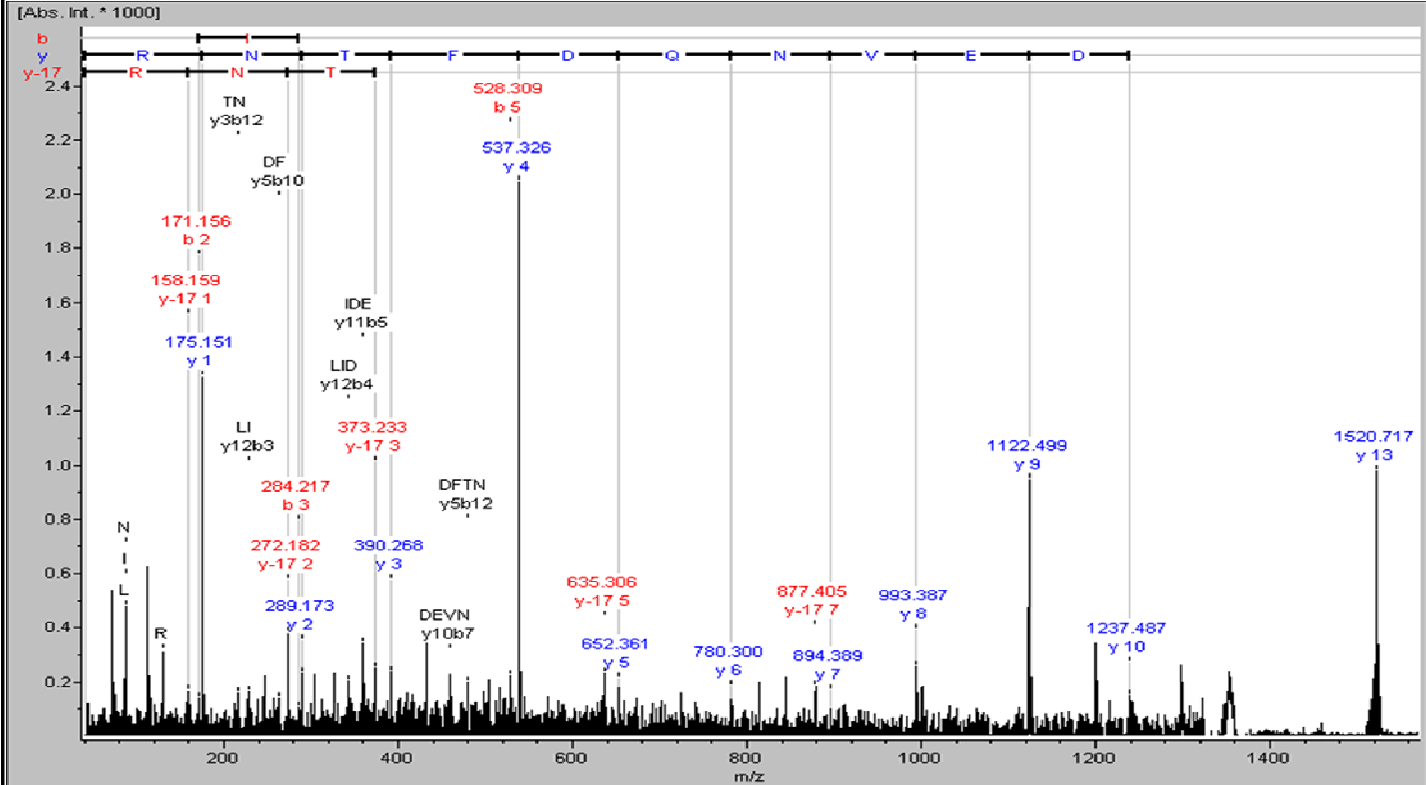

|      |  | Fragment Ion Mass Errors (Da) |       |       |       |       |        |        |        |        |        |     |     |        |
|------|--|-------------------------------|-------|-------|-------|-------|--------|--------|--------|--------|--------|-----|-----|--------|
|      |  | Gly                           | Leu   | Ile   | Asp   | Glu   | Val    | Asn    | Gln    | Asp    | Phe    | Thr | Asn | Arg    |
| Ion  |  | 1                             | 2     | 3     | 4     | 5     | 6      | 7      | 8      | 9      | 10     | 11  | 12  | 13     |
| a    |  |                               |       |       |       |       |        |        |        |        |        |     |     |        |
| b    |  |                               | 0.043 | 0.02  |       | 0.043 |        |        |        |        |        |     |     |        |
| b-17 |  |                               |       |       |       |       |        |        |        |        |        |     |     |        |
| b-18 |  |                               |       |       |       |       |        |        |        |        |        |     |     |        |
| b+18 |  |                               |       |       |       |       |        |        |        |        |        |     |     | -0.017 |
| y    |  | 0.032                         | 0.011 | 0.058 | 0.048 | 0.056 | -0.064 | -0.017 | -0.088 | -0.019 | -0.058 |     |     | -0.017 |
| y-17 |  | 0.042                         | 0.023 | 0.026 |       | 0.004 |        | 0.002  |        |        |        |     |     |        |
| i    |  |                               | 0     | 0     |       |       |        |        |        |        |        |     |     | 0.036  |
|      |  | Arg                           | Asn   | Thr   | Phe   | Asp   | Gln    | Asn    | Val    | Glu    | Asp    | Ile | Leu | Gly    |

| Apolipoprotein A-I precursor | Mascot Score (48) | Mr(calc)  | ppm  | Miss | Score | Expect | Peptide          |
|------------------------------|-------------------|-----------|------|------|-------|--------|------------------|
| Observed                     | Mr(expt)          | 1300.6411 | 1.98 | 0    | 48    | 0.0013 | R.THLAPYSDEL.R.Q |
| 1301.6510                    | 1300.6437         |           |      |      |       |        |                  |

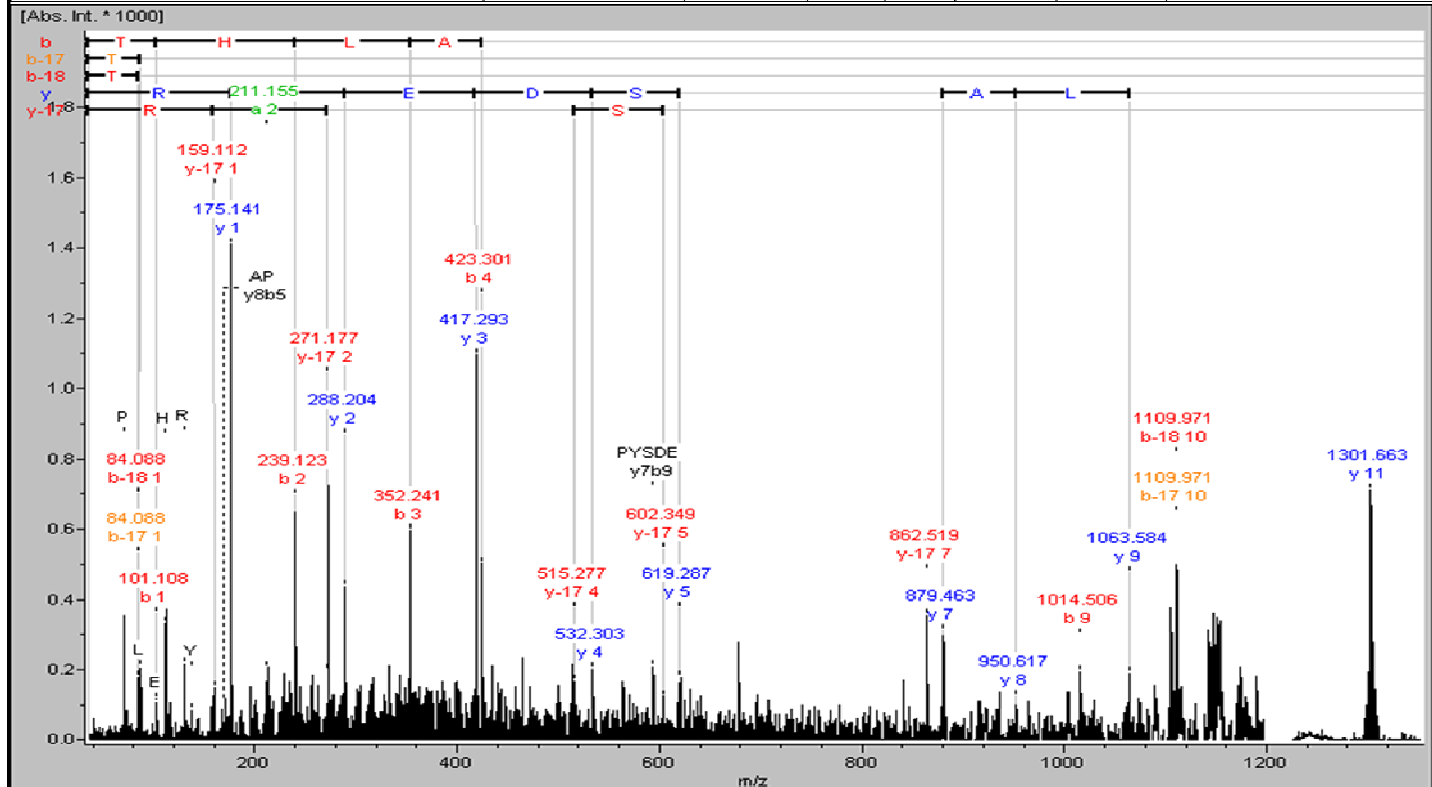

| Fragment Ion Mass Errors (Da) |       |        |       |       |        |       |       |       |       |       |       |
|-------------------------------|-------|--------|-------|-------|--------|-------|-------|-------|-------|-------|-------|
|                               | Thr   | His    | Leu   | Ala   | Pro    | Tyr   | Ser   | Asp   | Glu   | Leu   | Arg   |
| Ion                           | 1     | 2      | 3     | 4     | 5      | 6     | 7     | 8     | 9     | 10    | 11    |
| a                             |       | 0.036  |       |       |        |       |       |       |       |       |       |
| b                             |       | 0.009  | 0.043 | 0.066 |        |       |       |       | 0.053 |       |       |
| b-17                          |       |        |       |       |        |       |       |       |       |       |       |
| b-18                          | 0.043 |        |       |       |        |       |       |       |       |       |       |
| b+18                          |       |        |       |       |        |       |       |       |       |       |       |
| y                             | 0.022 | 0.001  | 0.047 | 0.031 | -0.017 |       | 0.043 | 0.159 | 0.042 |       | 0.015 |
| y-17                          |       | -0.023 |       | 0.007 | 0.047  |       | 0.102 |       |       |       |       |
| i                             |       | 0.021  | 0.057 |       | 0.01   | 0.014 |       |       |       | 0.057 | 0.012 |
|                               | Arg   | Leu    | Glu   | Asp   | Ser    | Tyr   | Pro   | Ala   | Leu   | His   | Thr   |



| Serum amyloid P-component precursor | Mascot Score (43) | Mr(calc) | ppm   | Miss | Score | Expect | Peptide        |
|-------------------------------------|-------------------|----------|-------|------|-------|--------|----------------|
| Observed                            | Mr(expt)          | 1155.592 | -2.32 | 0    | 43    | 0.0041 | R.VGEYSLYIGR.H |
| 1156.5970                           | 1155.5897         | 1155.592 | -2.32 | 0    | 43    | 0.0041 | R.VGEYSLYIGR.H |

[Abs. Int. \* 1000]

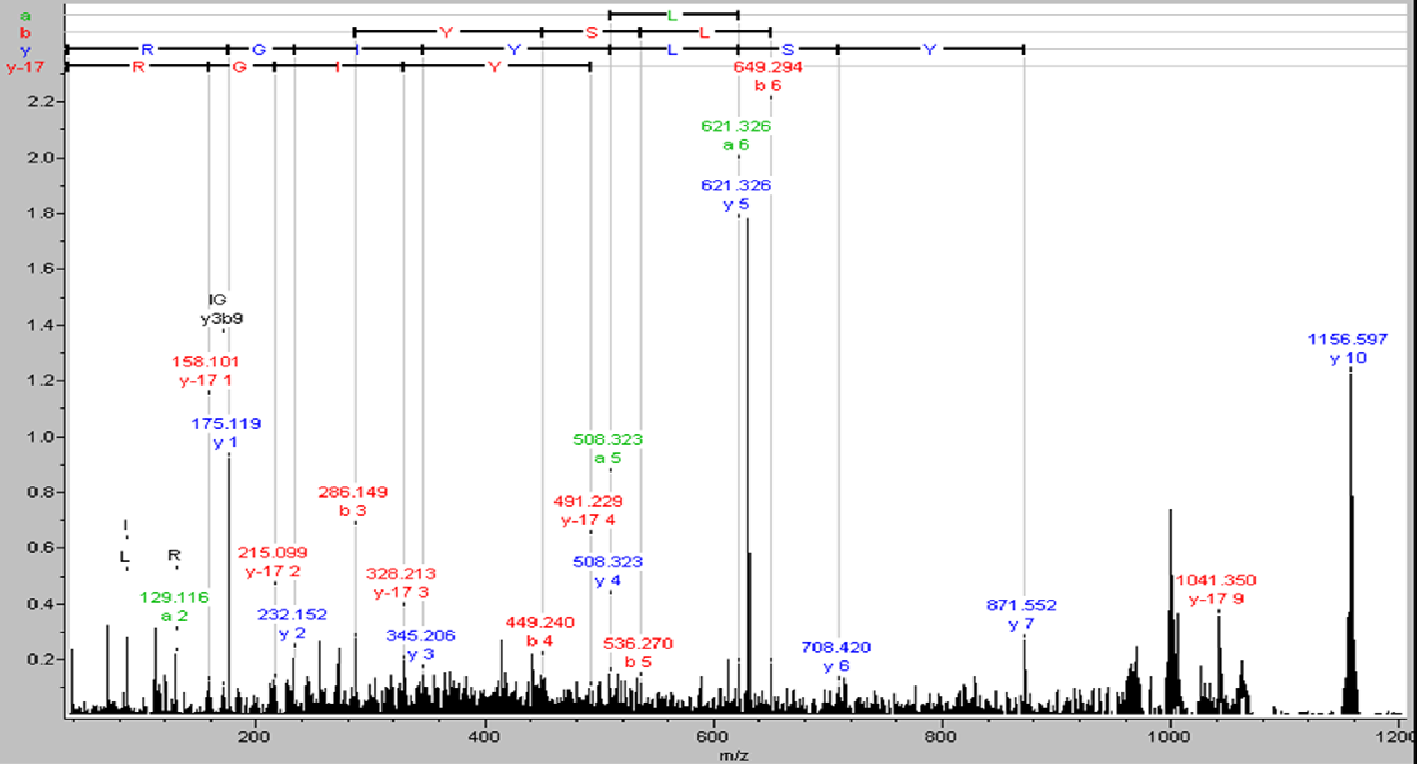

| Ion  | Val 1  | Gly 2  | Glu 3  | Fragment Ion Mass Errors (Da) |        |        | Tyr 7 | Ile 8 | Gly 9 | Arg 10 |
|------|--------|--------|--------|-------------------------------|--------|--------|-------|-------|-------|--------|
|      |        |        |        | Tyr 4                         | Ser 5  | Leu 6  |       |       |       |        |
| a    |        | 0.014  |        |                               | 0.082  | 0.002  |       |       |       |        |
| b    |        |        | 0.009  | 0.037                         | 0.035  | -0.025 |       |       |       |        |
| b-17 |        |        |        |                               |        |        |       |       |       |        |
| b-18 |        |        |        |                               |        |        |       |       |       |        |
| b+18 |        | 0.011  |        |                               |        |        |       |       |       | -0.003 |
| y    | 0      | 0.012  | -0.018 | 0.035                         | -0.046 | 0.016  | 0.085 |       |       | -0.003 |
| y-17 | -0.015 | -0.039 | -0.009 | -0.056                        |        |        |       |       |       |        |
| i    |        |        |        |                               |        | -0.01  |       | -0.01 |       | 0.003  |
|      | Arg    | Gly    | Ile    | Tyr                           | Leu    | Ser    | Tyr   | Glu   | Gly   | Val    |

| Histone H3-like | Mascot Score37  | Mr(calc)        | ppm          | Miss        | Score        | Expect        | Peptide           |
|-----------------|-----------------|-----------------|--------------|-------------|--------------|---------------|-------------------|
| <b>Observed</b> | <b>Mr(expt)</b> | <b>Mr(calc)</b> | <b>ppm</b>   | <b>Miss</b> | <b>Score</b> | <b>Expect</b> | <b>Peptide</b>    |
| <b>788.4709</b> | <b>787.4636</b> | <b>787.4704</b> | <b>-8.67</b> | <b>1</b>    | <b>37</b>    | <b>0.019</b>  | <b>R.KLPFQR.L</b> |

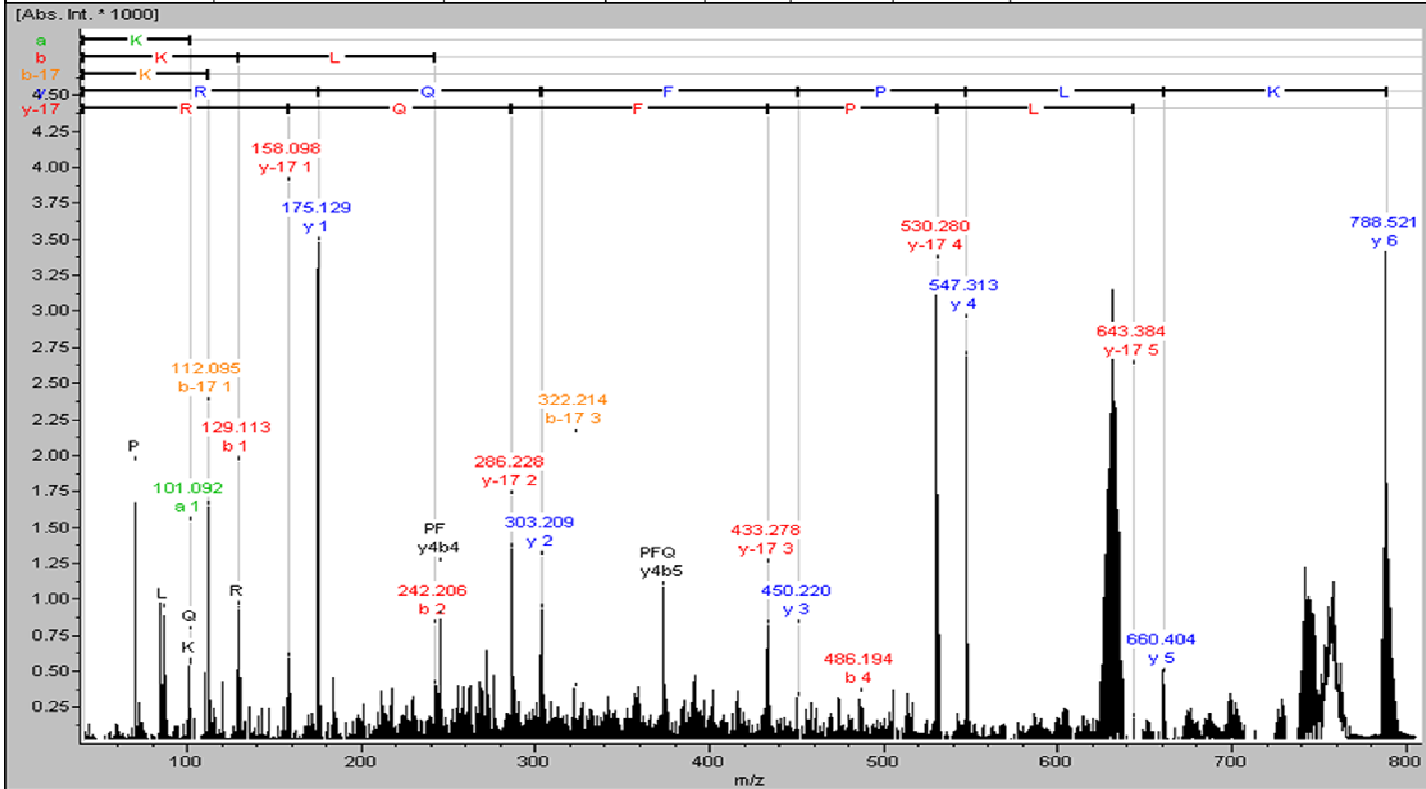

| Fragment Ion Mass Errors (Da) |        |        |        |        |       |       |
|-------------------------------|--------|--------|--------|--------|-------|-------|
|                               | Lys    | Leu    | Pro    | Phe    | Gln   | Arg   |
| Ion                           | 1      | 2      | 3      | 4      | 5     | 6     |
| a                             | -0.015 |        |        |        |       |       |
| b                             | 0.011  | 0.02   |        | -0.114 |       |       |
| b-17                          | 0.019  |        | 0.002  |        |       |       |
| b-18                          |        |        |        |        |       |       |
| b+18                          |        |        |        |        |       | 0.044 |
| y                             | 0.01   | 0.032  | -0.026 | 0.014  | 0.021 | 0.044 |
| y-17                          | -0.019 | 0.053  | 0.034  | -0.016 | 0.004 |       |
| i                             | -0.015 | -0.001 | -0.007 |        | 0.022 | 0     |
|                               | Arg    | Gln    | Phe    | Pro    | Leu   | Lys   |

| Annexin A2       | Mascot Score (46) |                  |              |          |           |               |                      |
|------------------|-------------------|------------------|--------------|----------|-----------|---------------|----------------------|
| Observed         | Mr(expt)          | Mr(calc)         | ppm          | Miss     | Score     | Expect        | Peptide              |
| <b>1111.5510</b> | <b>1110.5437</b>  | <b>1110.5458</b> | <b>-1.86</b> | <b>0</b> | <b>46</b> | <b>0.0015</b> | <b>R.QDIAFAYQR.R</b> |

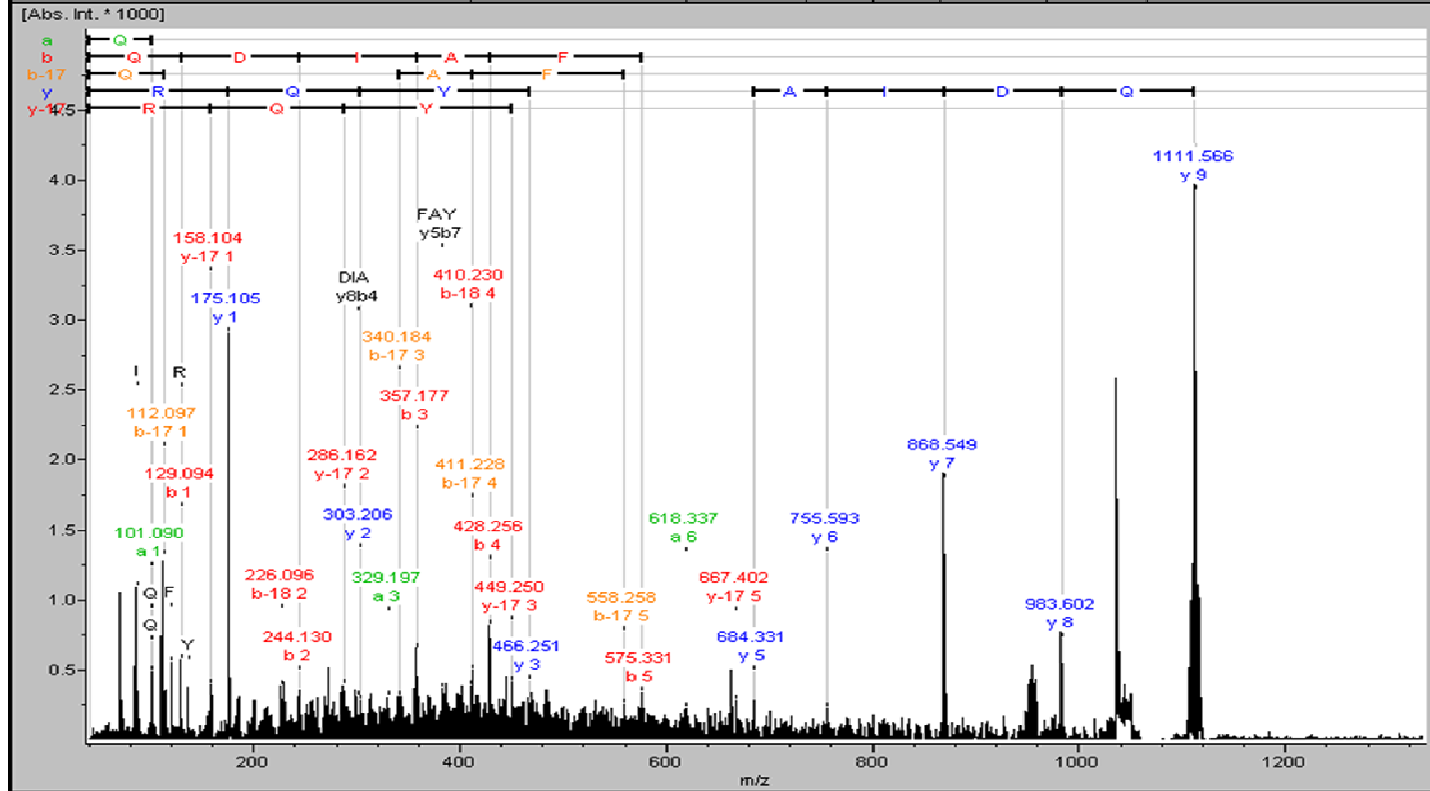

|     |      | Fragment Ion Mass Errors (Da) |        |       |       |        |       |       |       |        |
|-----|------|-------------------------------|--------|-------|-------|--------|-------|-------|-------|--------|
|     |      | Gln                           | Asp    | Ile   | Ala   | Phe    | Ala   | Tyr   | Gln   | Arg    |
|     |      | 1                             | 2      | 3     | 4     | 5      | 6     | 7     | 8     | 9      |
| Ion | a    | 0.019                         |        | 0.015 |       |        | 0.012 |       |       |        |
|     | b    | 0.028                         | 0.037  | 0     | 0.042 | 0.049  |       |       |       |        |
|     | b-17 | 0.058                         |        | 0.034 | 0.041 | 0.002  |       |       |       |        |
|     | b-18 |                               | 0.013  |       | 0.026 |        |       |       |       |        |
|     | b+18 |                               |        |       |       |        |       |       |       | 0.013  |
|     | y    | -0.014                        | 0.029  | 0.011 |       | -0.016 | 0.209 | 0.081 | 0.108 | 0.013  |
|     | y-17 | -0.012                        | -0.013 | 0.012 |       | 0.058  |       |       |       |        |
|     | i    | 0.019                         |        | 0     |       | 0.015  |       | 0.02  | 0.019 | -0.019 |
|     |      | Arg                           | Gln    | Tyr   | Ala   | Phe    | Ala   | Ile   | Asp   | Gln    |
